# Supplementary material
Source: PubMed Central journal article supplement (PMC8800882)
Supplement: 296_2021_5054_MOESM2_ESM.pdf [file 296_2021_5054_MOESM2_ESM.pdf]

**Title:** Participation in physical activity decreased more in people with Rheumatoid Arthritis during the COVID-19 lockdown: a cross-sectional study

**Journal:** Rheumatology International

**Authors:** Christopher. Balchin<sup>1</sup>, Ai Lyn. Tan<sup>2, 3</sup>, Oliver. Wilson<sup>1</sup>, Jim. McKenna<sup>1</sup>, Antonios. Stavropoulos-Kalinoglou<sup>1</sup>

<sup>1</sup>Leeds Beckett University, Carnegie School of Sport, Leeds, UK

<sup>2</sup> University of Leeds, Leeds Institute of Rheumatic and Musculoskeletal Medicine, Chapel Allerton Hospital, Leeds, UK

<sup>3</sup> Leeds Teaching Hospitals NHS Trust, NIHR Leeds Biomedical Research Centre, Leeds, UK

**Corresponding author:** Dr Antonios Stavropoulos-Kalinoglou, Leeds Beckett University, Carnegie School of Sport, 225 Fairfax Hall, Headingley Campus, Churchwood Avenue, Leeds, LS6 3QS, [A.Stavropoulos@leedsbeckett.ac.uk](mailto:A.Stavropoulos@leedsbeckett.ac.uk)

**Online Resource 2:** Raw score to metric score conversion table for SWEMWBS. Transformed scores were subsequently used for parametric analyses

| Raw Score (7-35) | Metric Score (7-35) |
|------------------|---------------------|
| 7                | 7.00                |
| 8                | 9.51                |
| 9                | 11.25               |
| 10               | 12.40               |
| 11               | 13.33               |
| 12               | 14.08               |
| 13               | 14.75               |
| 14               | 15.32               |
| 15               | 15.84               |
| 16               | 16.36               |
| 17               | 16.88               |
| 18               | 17.43               |
| 19               | 17.98               |
| 20               | 18.59               |
| 21               | 19.25               |
| 22               | 19.98               |
| 23               | 20.73               |
| 24               | 21.54               |
| 25               | 22.35               |
| 26               | 23.21               |
| 27               | 24.11               |
| 28               | 25.03               |
| 29               | 26.02               |
| 30               | 27.03               |
| 31               | 28.13               |
| 32               | 29.31               |
| 33               | 30.70               |
| 34               | 32.55               |
| 35               | 35.00               |
