# Supplementary material
Source: PubMed Central journal article supplement (PMC8800882)
Supplement: 296_2021_5054_MOESM4_ESM.pdf [file 296_2021_5054_MOESM4_ESM.pdf]

**Title:** Participation in physical activity decreased more in people with Rheumatoid Arthritis during the COVID-19 lockdown: a cross-sectional study

**Journal:** Rheumatology International

**Authors:** Christopher. Balchin<sup>1</sup>, Ai Lyn. Tan<sup>2, 3</sup>, Oliver. Wilson<sup>1</sup>, Jim. McKenna<sup>1</sup>, Antonios. Stavropoulos-Kalinoglou<sup>1</sup>

<sup>1</sup>Leeds Beckett University, Carnegie School of Sport, Leeds, UK

<sup>2</sup> University of Leeds, Leeds Institute of Rheumatic and Musculoskeletal Medicine, Chapel Allerton Hospital, Leeds, UK

<sup>3</sup> Leeds Teaching Hospitals NHS Trust, NIHR Leeds Biomedical Research Centre, Leeds, UK

**Corresponding author:** Dr Antonios Stavropoulos-Kalinoglou, Leeds Beckett University, Carnegie School of Sport, 225 Fairfax Hall, Headingley Campus, Churchwood Avenue, Leeds, LS6 3QS, [A.Stavropoulos@leedsbeckett.ac.uk](mailto:A.Stavropoulos@leedsbeckett.ac.uk)

**Online Resource 4:** Mental wellbeing categories and % of RA and non-RA participants. Three-category versions of mental wellbeing were derived from transformed SWEMWBS scores: low, medium and high

| Mental wellbeing categories | RA (n = 27) | Non-RA (n = 101) |
|-----------------------------|-------------|------------------|
| Low (%)                     | 44          | 28               |
| Moderate                    | 48          | 64               |
| High                        | 8           | 8                |
